# Supplementary material
Source: Springer Nature journal article supplement (https://www.springermedizin.de/resource/supplementary/12943_2013_1178_MOESM9_ESM.pdf/9552268)

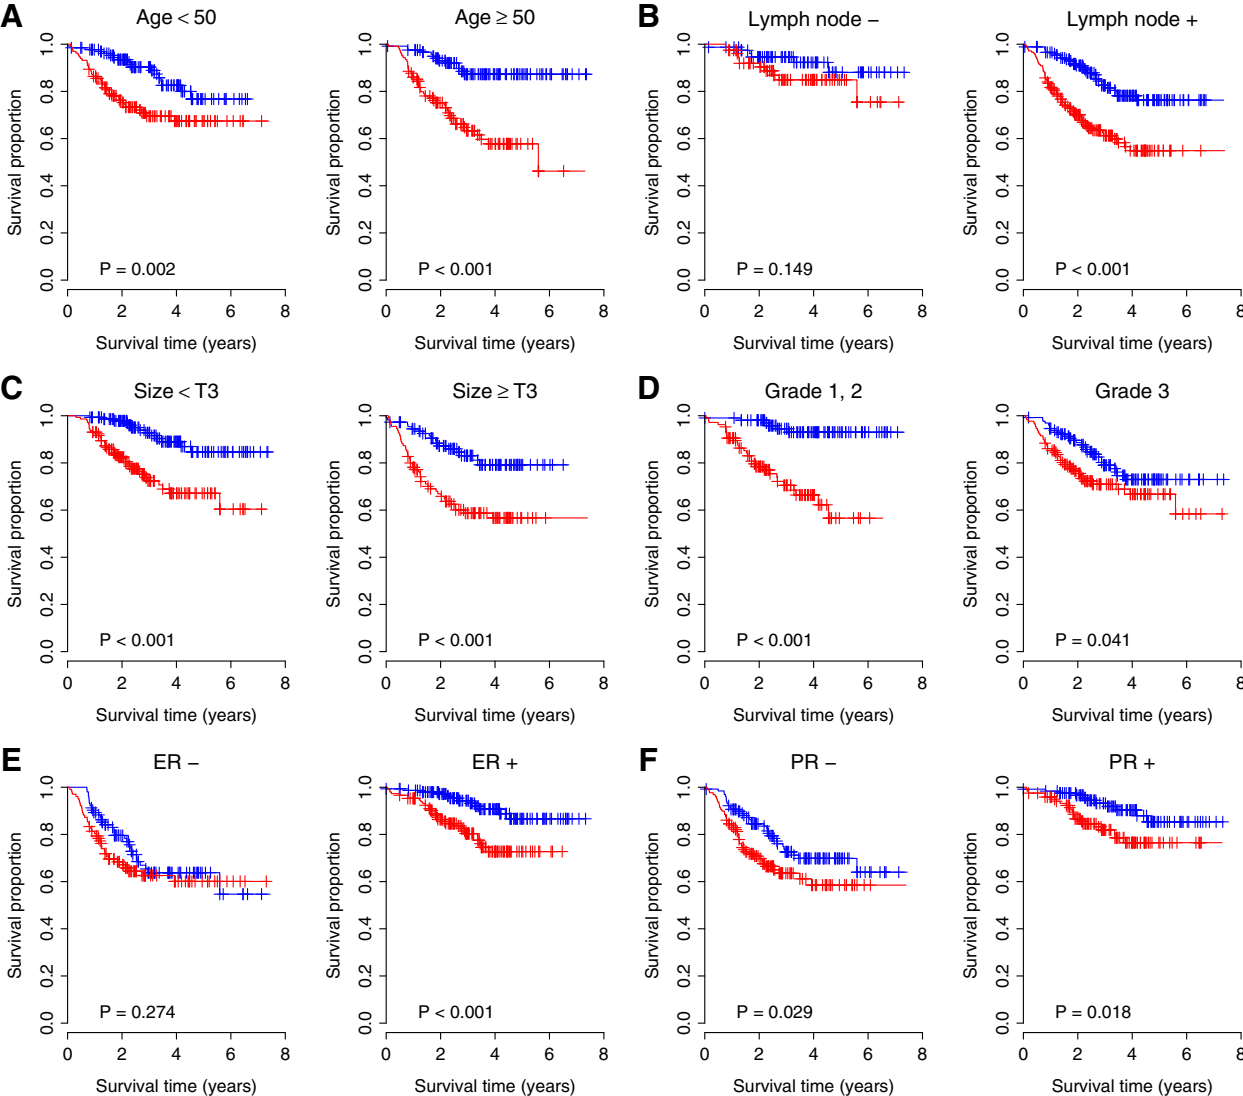

Supplement: MOESM9 [file 9552268]
